# Supplementary material
Source: MDPI journal article supplement (https://www.mdpi.com/2073-4344/8/12/633)
Supplement: s1 [file s1]

**Supplementary Materials: Carbonate-Catalyzed Room-Temperature Selective Reduction of Biomass-Derived 5-Hydroxymethylfurfural into
2,5-Bis(hydroxymethyl)furan**

Jingxuan Long, Wenfeng Zhao, Yufei Xu, Hu Li*, Song Yang*

Table of Contents:

Figure S1. LC-MS spectrum of the siloxane intermediate obtained in the hydrogenation of HMF to BHMF

Table S1. Effect of different hydrosilanes on the hydrogenation of HMF to BHMF

Figure S2. Images of the K2CO3-catalyzed hydrogenation of HMF to BHMF using PMHS as H-donor

Figure S3. GC-MS spectrum of BMHF obtained from hydrogenation of HMF

Figure S4. GC-MS spectrum of dimethoxydiphenylsilane obtained from the interaction of Ph2SiH2 and MeOH.

**
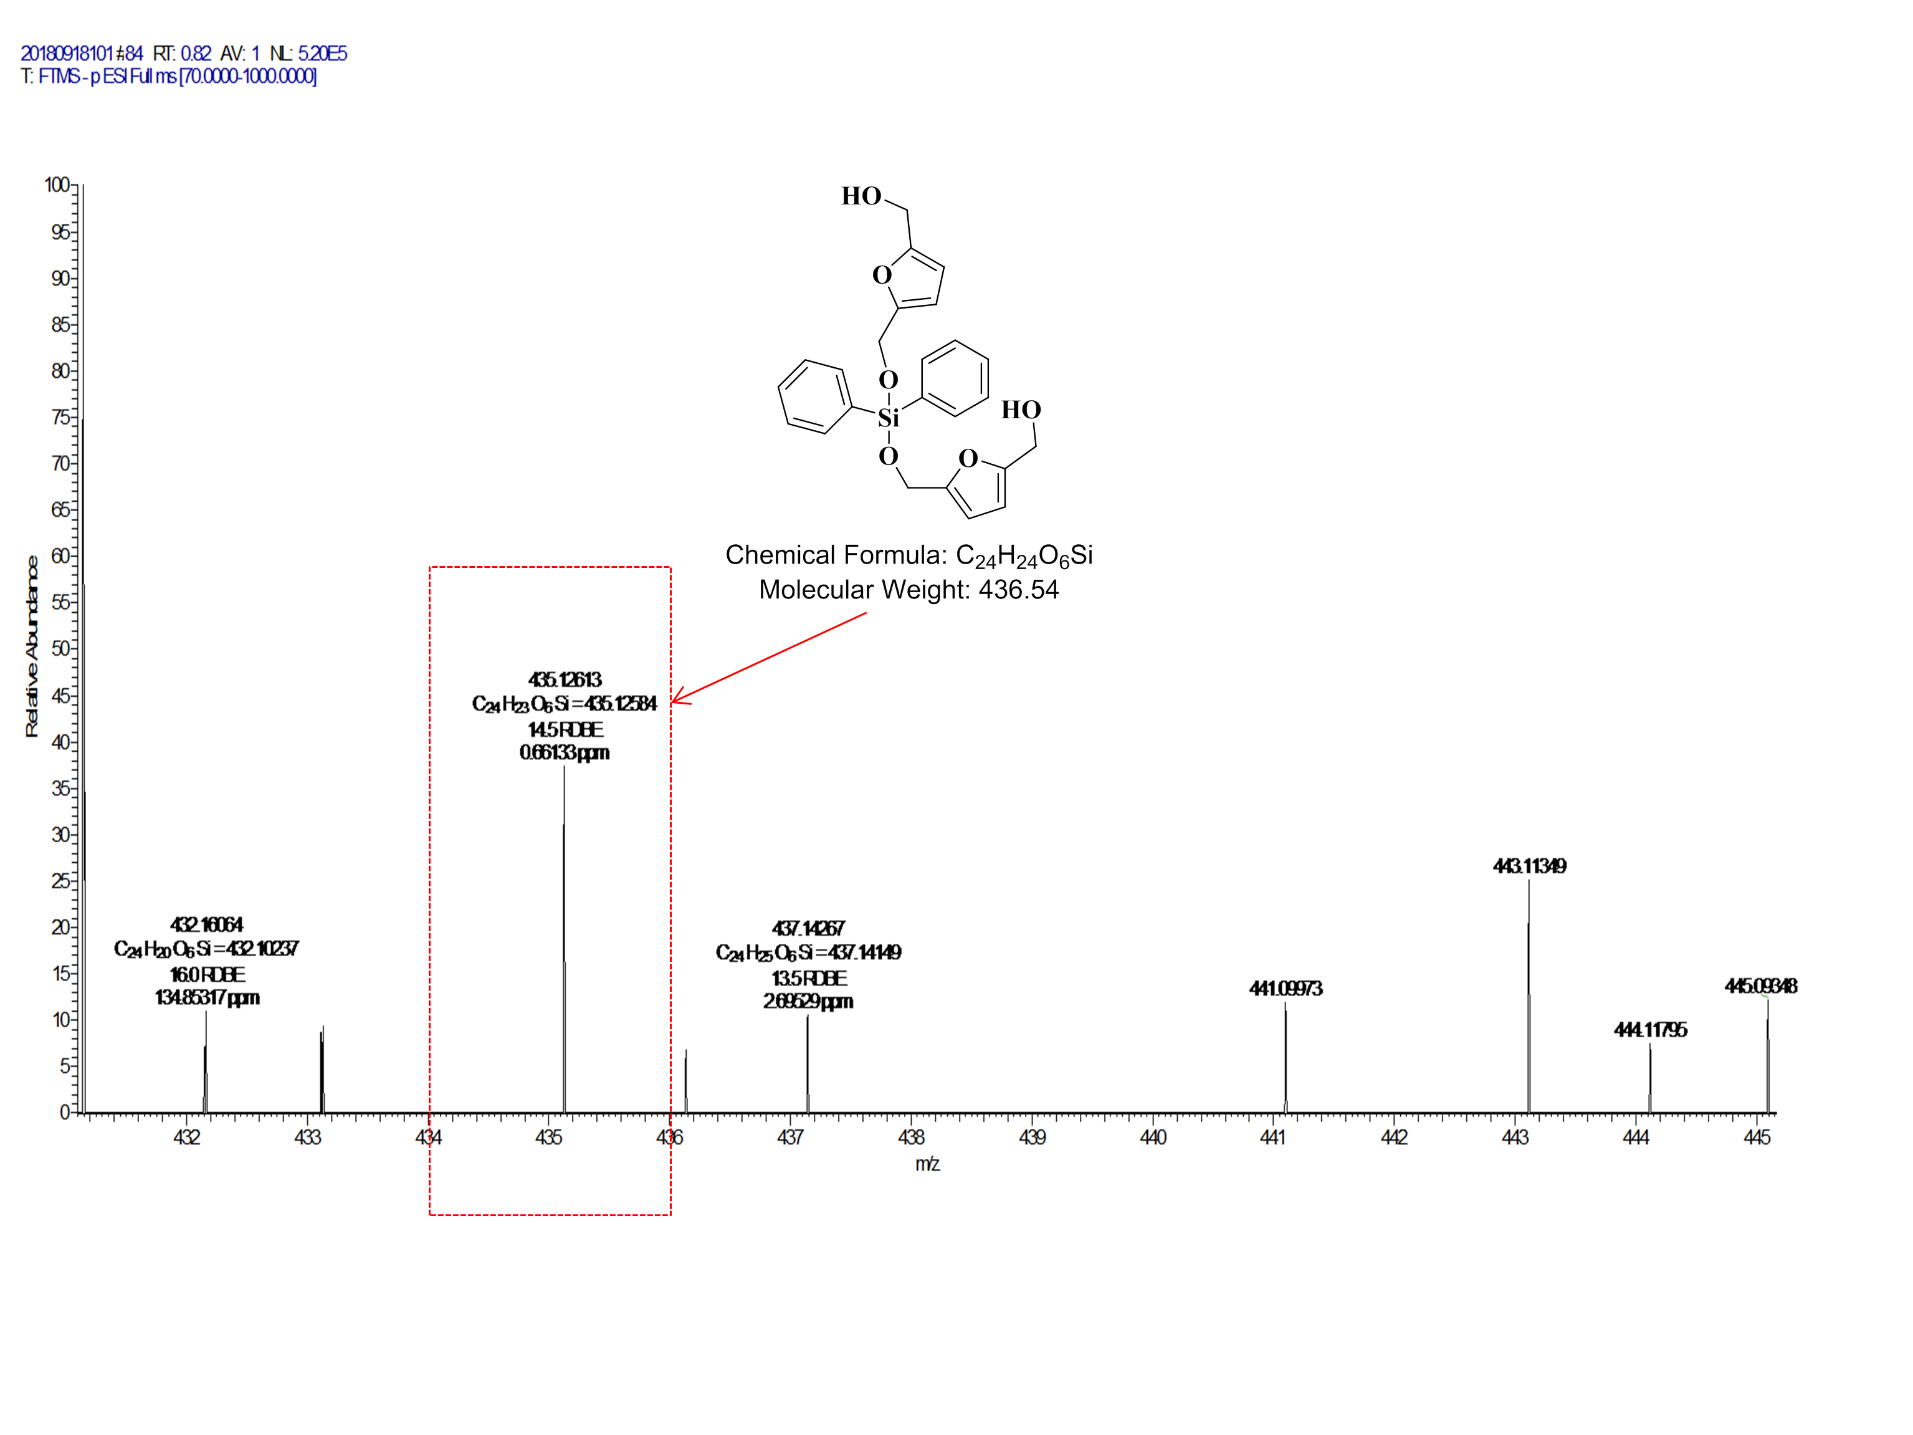
**

**Figure S1.** LC-MS spectrum of the siloxane intermediate obtained in the hydrogenation of HMF to BHMF. (Reaction conditions: 0.5 mmol HMF, Ph2SiH2 (1.4 mmol H-), 2 mL MTHF, 0.1 mmol K2CO3, 25 ºC, and 1 h.).

**T**able S1. Effect of different hydrosilanes on the hydrogenation of HMF to BHMF.

| **Entry** | **H-donor** | **Yield (%)** | **Conversion (%)** |
| --- | --- | --- | --- |
| 1 | Et3SiH | - | - |
| 2 | (MeO)3SiH | 3.1 | 9.5 |
| 3 | (EtO)3SiH | 10.0 | 31.0 |
| 4 | Me2SiH-O-HSiMe2 | 32.0 | 60.0 |
| 7*a* | PMHS | 66.0 | 100 |
| 5*a* | Ph2SiH2 | 94.2 | 100 |
| 6*a* | PhSiH3 | 92.0 | 100 |

Reaction conditions: 0.5 mmol HMF, 0.1 mmol K2CO3, H-donor (1.4 mmol H-), 2 mL MTHF, 25 °C, and 2 h. aAfter the reaction, 3 mL methanol was added into the reaction mixture, followed by stirring under ambient conditions for 30 min. PMHS: polymethylhydrosiloxane.

**
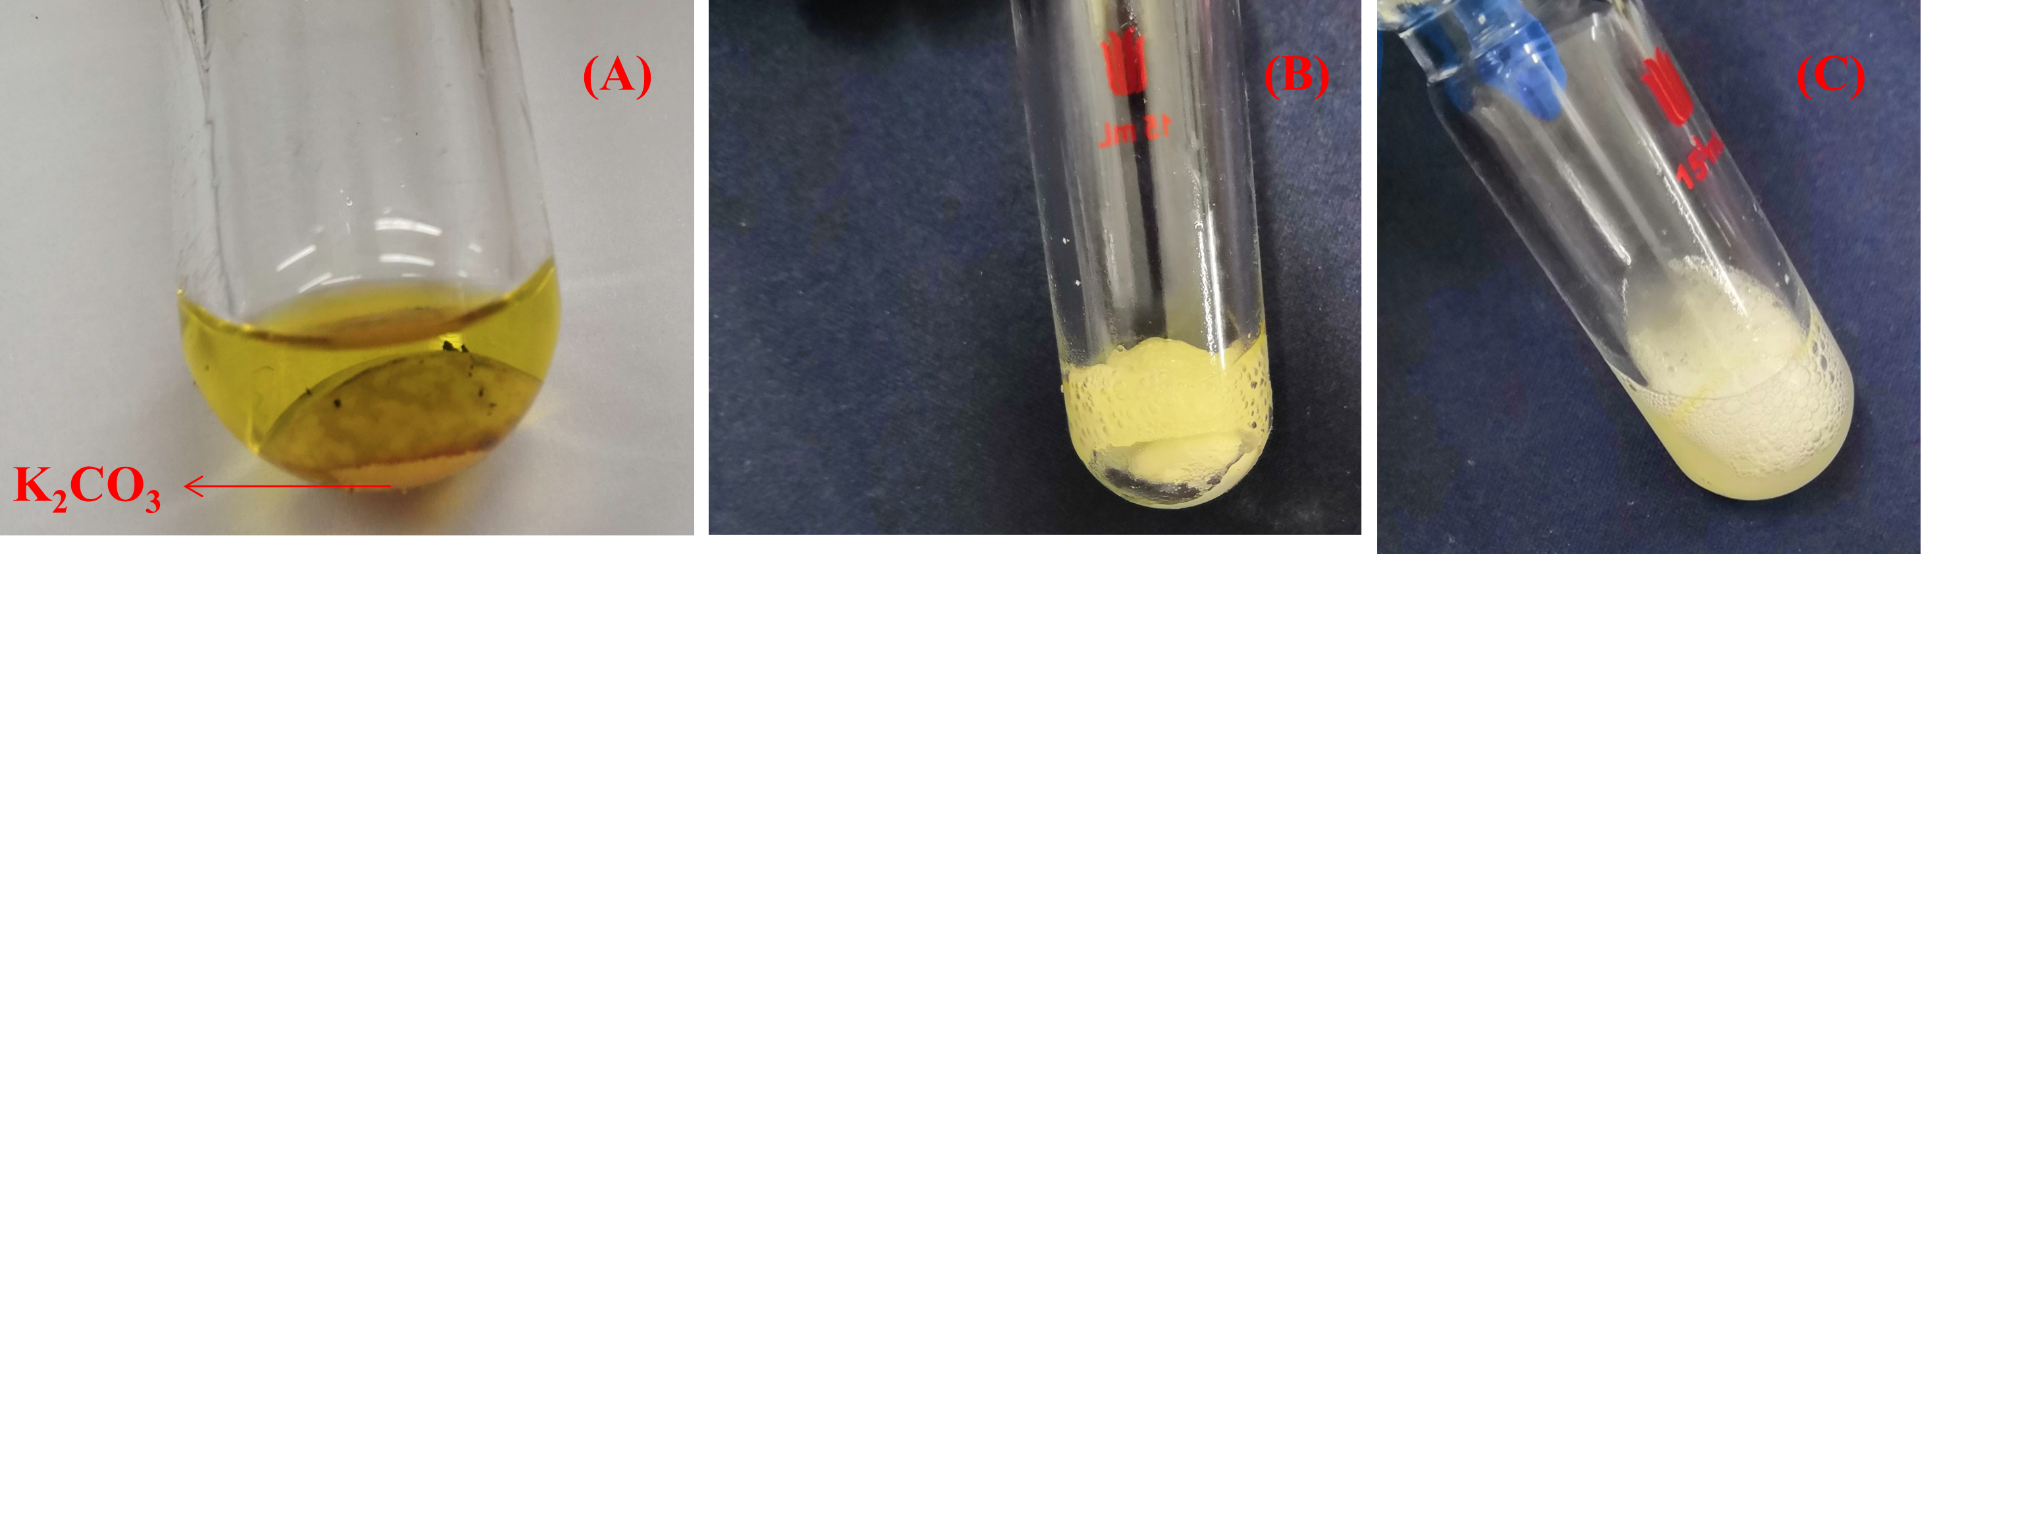
**

**Figure S2.** Images of the K2CO3-catalyzed hydrogenation of HMF to BHMF using PMHS as H-donor. (A) Initial reaction solution without PMHS, (B) Reaction mixture with PMHS at room temperature after reacting for 2h, and (C) After the reaction, 3 mL methanol was added into the reaction mixture, followed by stirring under ambient conditions for 30 min. (Reaction conditions: 0.5 mmol HMF, PMHS (1.4 mmol H-), 2 mL MTHF, 0.1 mmol K2CO3, 25 ºC, and 2 h.).

**
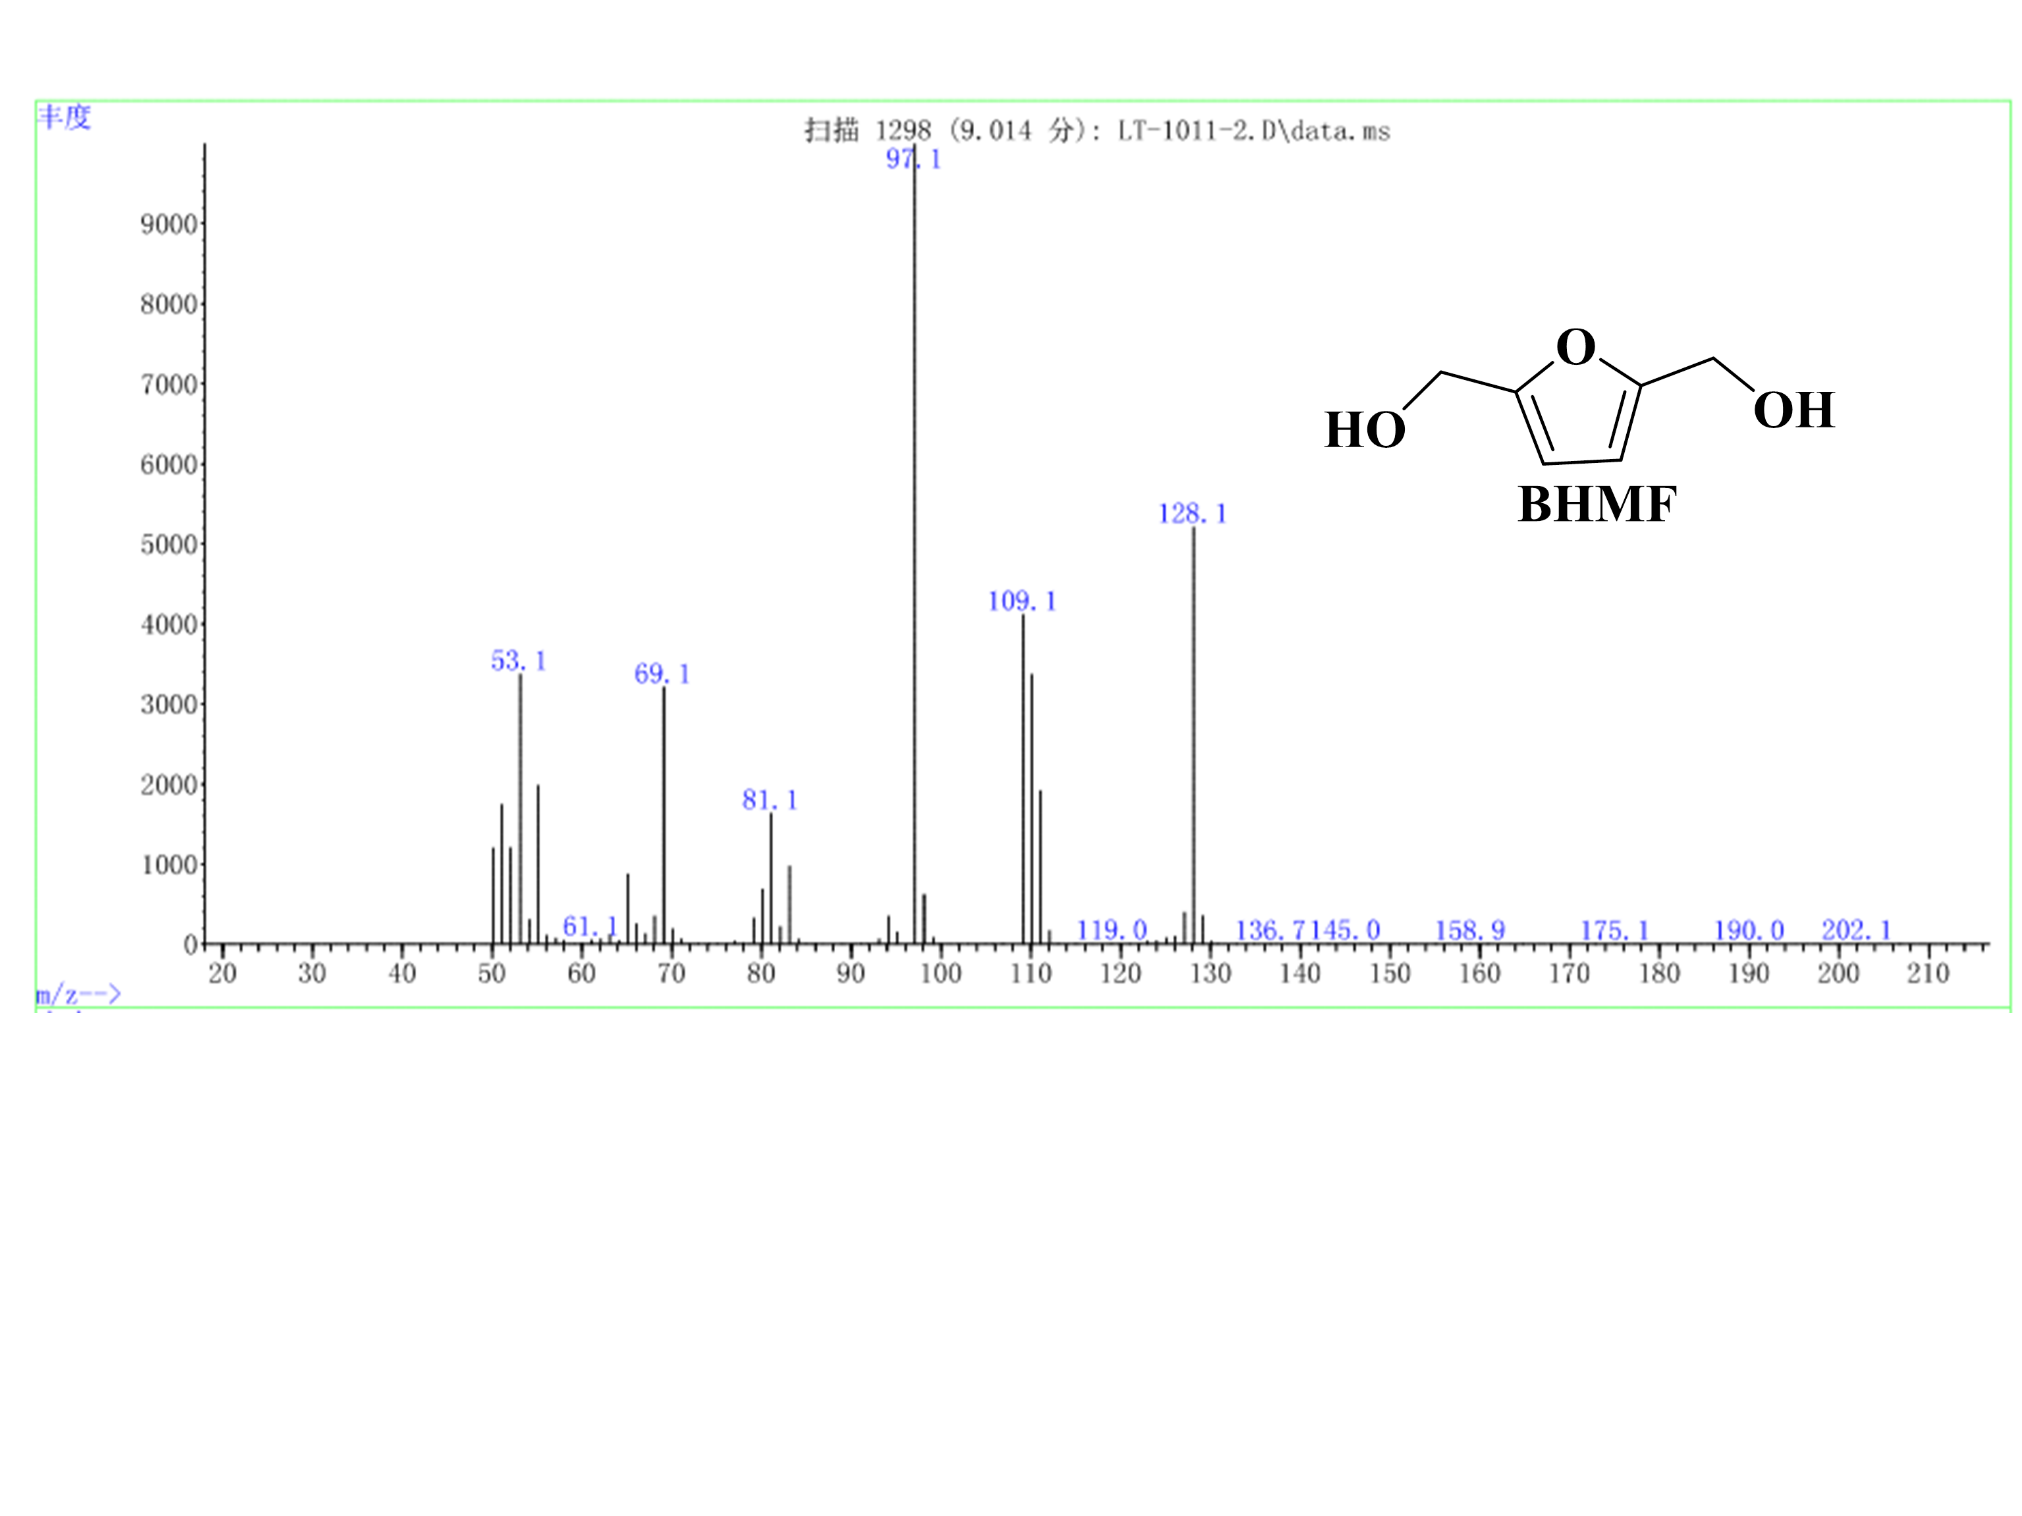
**

**Figure** S3. GC-MS spectrum of BMHF obtained from hydrogenation of HMF.

**
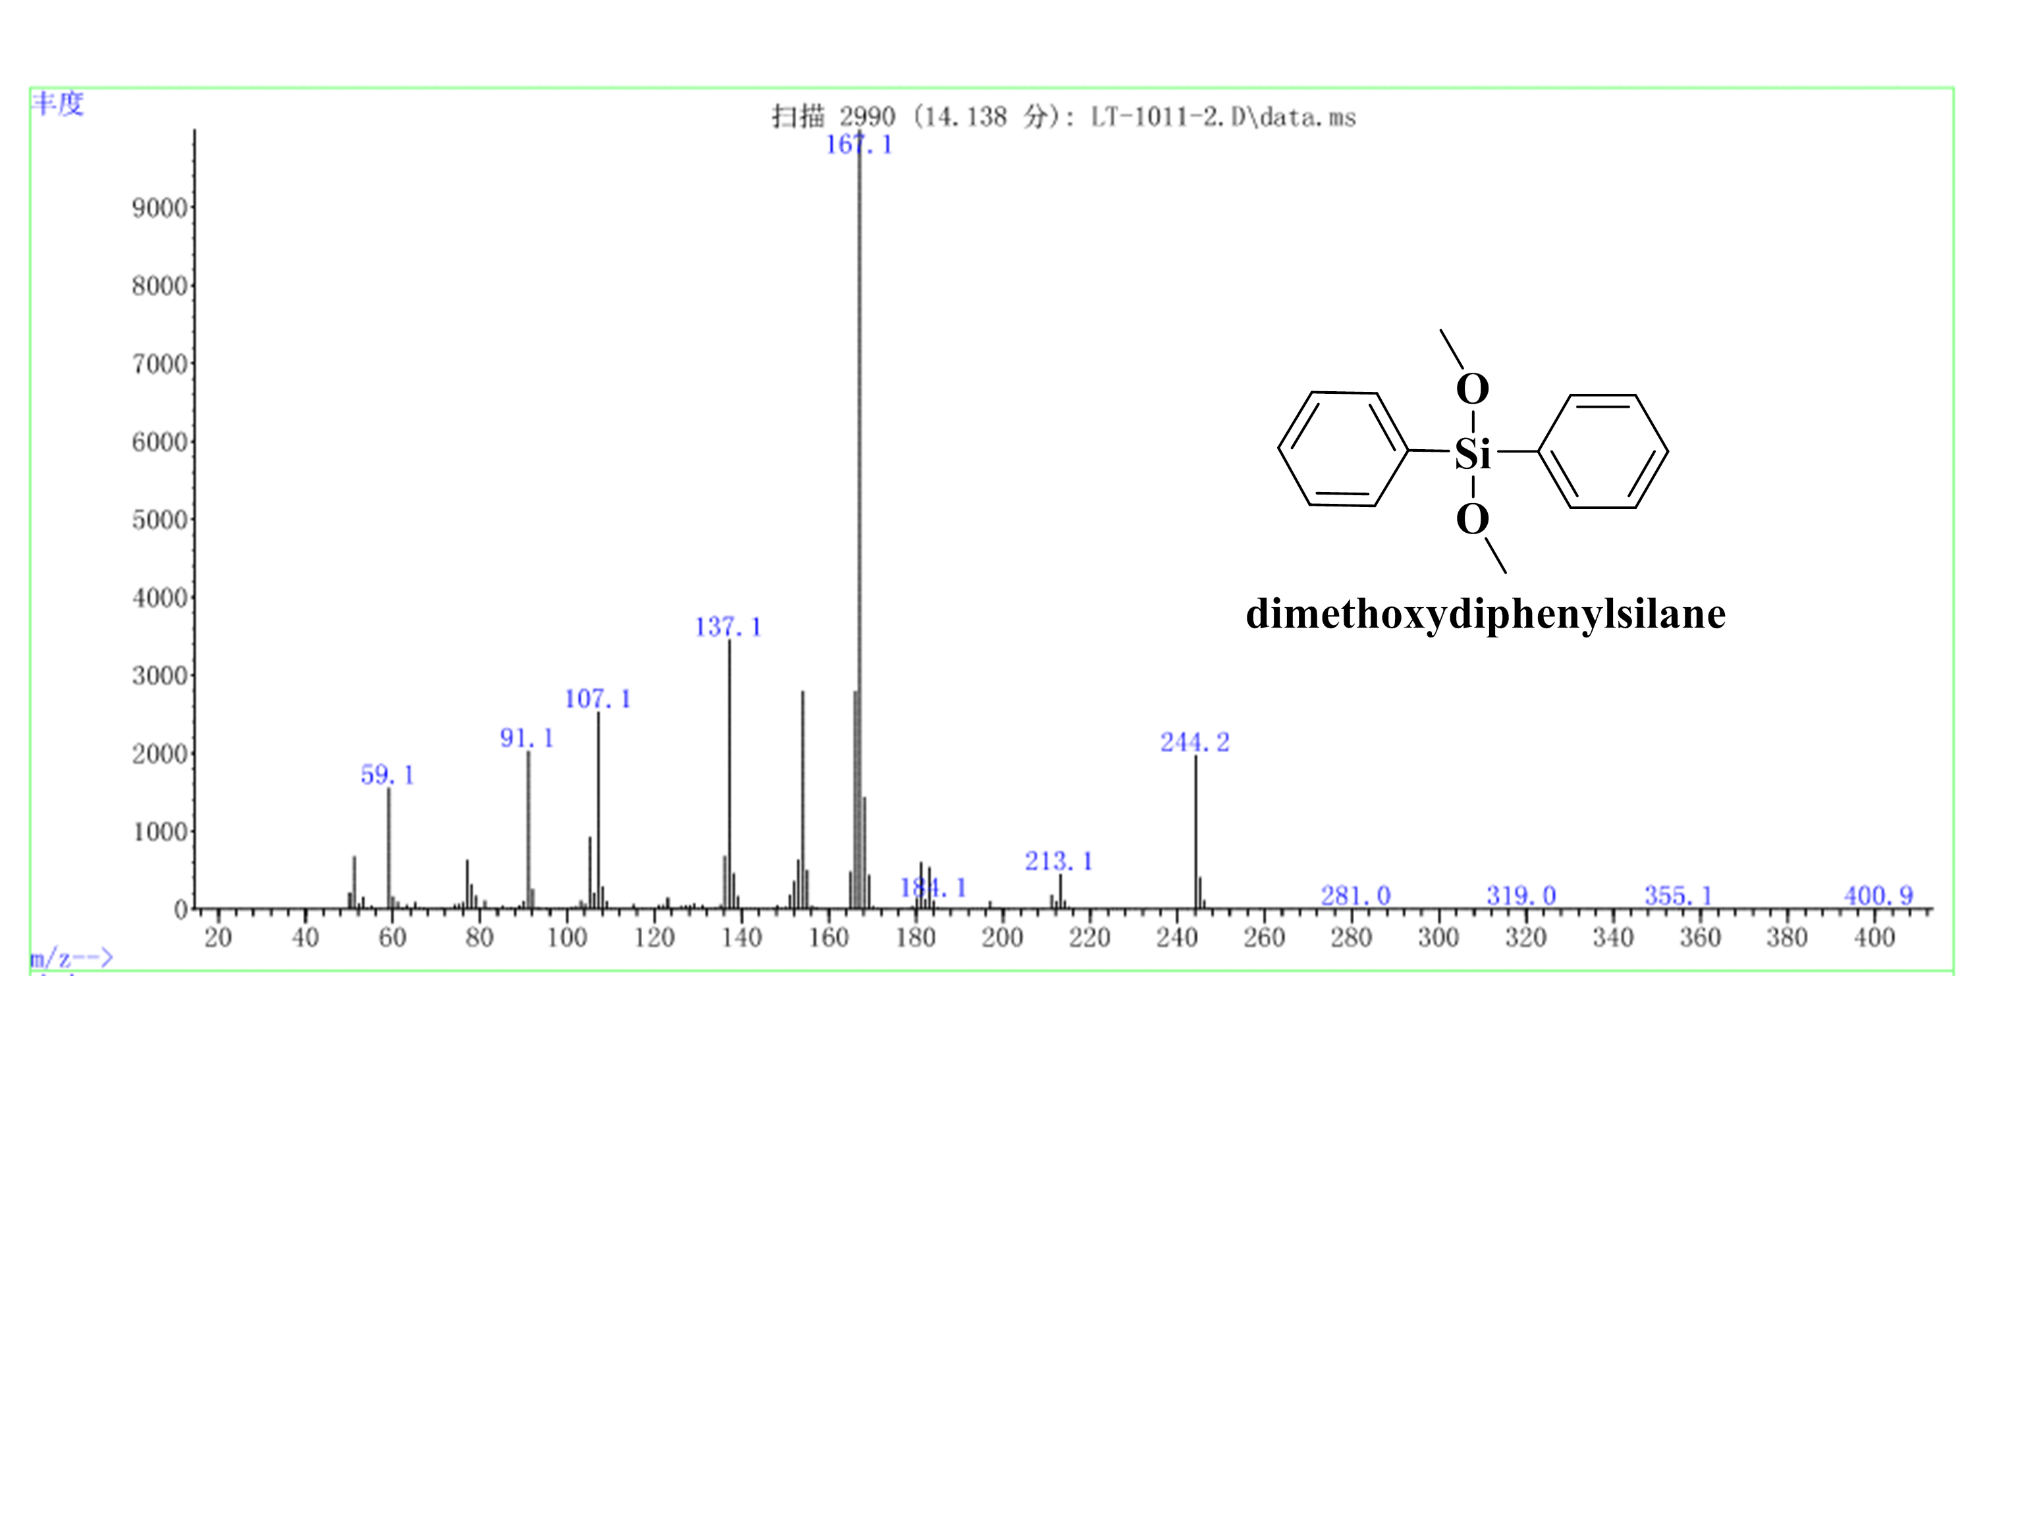
**

**Figure** S4. GC-MS spectrum of dimethoxydiphenylsilane obtained from the interaction of Ph2SiH2 and MeOH.
